# Supplementary material for: Decoding subjective emotional arousal from EEG during an immersive virtual reality experience
Source: eLife journal article supplement (doi:10.7554/elife.64812), 2021-10-28
Supplement: supp [file elife-64812-supp-v1.zip]

Archive with 7 entries (7 files):
- elife_poa_e64812_Figure_5_figure_supplement_1.pdf
- elife_poa_e64812_Figure_6_figure_supplement_1.pdf
- elife_poa_e64812_Figure_2_source_data_1.csv
- elife_poa_e64812_Figure_4_source_data_1.zip
- elife_poa_e64812_Figure_8_source_data_1.zip
- elife_poa_e64812_Figure_10_source_data_1.zip
- elife_poa_e64812_Transparent_Reporting_File.pdf
