# Supplementary material for: Decoding subjective emotional arousal from EEG during an immersive virtual reality experience
Source: eLife journal article supplement (doi:10.7554/elife.64812), 2021-10-28
Supplement: supp [file elife-64812-supp-v1.zip › elife_poa_e64812_Figure_2_source_data_1.csv]

# Alpha peak frequencies (Hz) per subject and condition
participant	restingstate	nomov	mov
NVR_S01	11.320057974486	NA	NA
NVR_S02	10.6980870204243	10.7743830338361	11.1966881314536
NVR_S03	10.5295813100907	10.7483435924983	NA
NVR_S04	9.92859782319957	9.8070156567398	10.3567018731332
NVR_S05	10.2869424666299	10.0727340285632	10.2893565167676
NVR_S06	10.3021561208493	12.2609409165139	12.6152824881184
NVR_S07	11.5994365468968	10.6530746183183	NA
NVR_S08	11.1860666399345	11.3052964888172	11.0846400068791
NVR_S09	10.2357069056748	10.8967947474193	11.537250885561
NVR_S10	9.49371303472395	NA	NA
NVR_S11	11.4850735774544	11.5467637782544	9.16568962733538
NVR_S13	11.2245643899896	9.63923562399662	10.5603498111475
NVR_S14	10.6967498946016	9.55798713630046	10.0027847513592
NVR_S15	10.2645462213244	11.5046039290155	NA
NVR_S16	10.4488090516847	NA	NA
NVR_S17	9.639391445903	9.52500797449309	11.4998598741756
NVR_S18	8.47860340487862	10.7399129285561	10.3947964115341
NVR_S19	11.1255902632135	NA	NA
NVR_S20	10.2866955534367	11.0075173812633	12.2966695110094
NVR_S21	10.657045555036	12.4448822407624	12.2265340844761
NVR_S22	9.40074684437896	10.8243413023301	10.2376805990143
NVR_S23	9.49877747857567	NA	NA
NVR_S24	10.4112985069578	9.52256296431354	9.10115526614038
NVR_S25	10.9986912572726	11.457823841256	11.2009484806248
NVR_S26	11.0067783487337	11.1408914064434	NA
NVR_S27	10.5213655579428	11.7390757049006	12.2083688123485
NVR_S28	9.03272261172951	11.0304722540593	11.1387617347989
NVR_S29	9.97603087358882	11.7191597515528	12.165867829206
NVR_S30	9.23216003947518	10.0586531507922	NA
NVR_S31	8.65266110477209	10.5495332403736	11.7292945690628
NVR_S32	9.70680029189524	NA	NA
NVR_S33	8.76396808323271	NA	NA
NVR_S34	10.8261026494135	12.204003990691	12.2547856864531
NVR_S35	9.68412824880619	9.9423419531919	10.4616243852295
NVR_S36	10.0805197329947	10.2588314219454	10.3137270269795
NVR_S37	9.27296981256615	10.7093273602872	9.92339072188166
NVR_S38	8.59318974115189	NA	NA
NVR_S39	10.0466651512355	10.951810884195	11.0987945658097
NVR_S40	9.92270139782571	NA	NA
NVR_S41	9.66519970493947	NA	NA
NVR_S42	10.3449599883487	11.8566599358912	12.1307524938413
NVR_S43	10.1012567362307	NA	NA
NVR_S44	10.5768209697037	10.4118014365847	10.8475967091965
NVR_S45	10.3263450964261	NA	NA
