# Supplementary figures and images for: Decoding subjective emotional arousal from EEG during an immersive virtual reality experience
Source: eLife journal article supplement (doi:10.7554/elife.64812), 2021-10-28

## Emotional arousal ratings (no-movement condition)

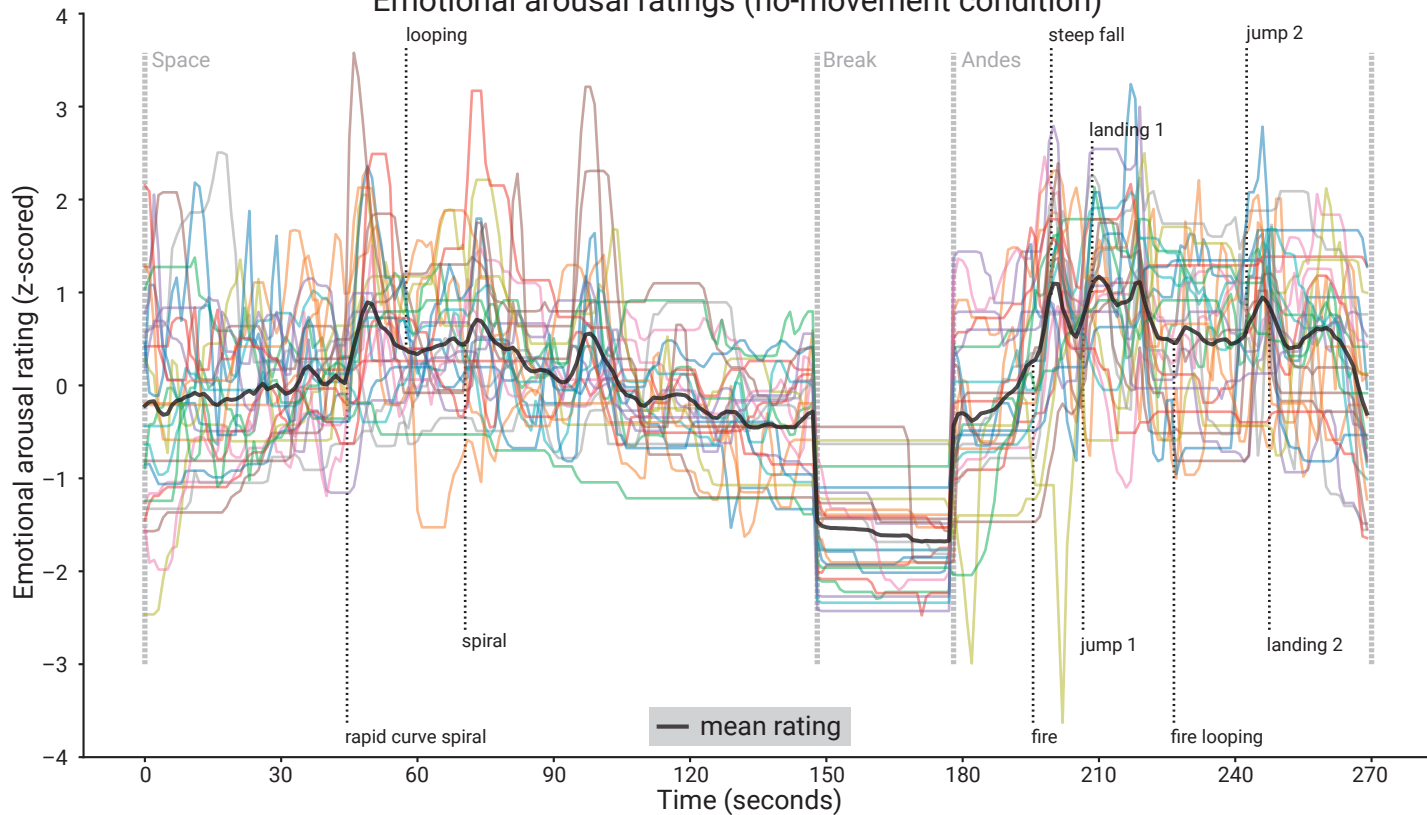

Supplement: supp [file elife-64812-supp-v1.zip › elife_poa_e64812_Figure_5_figure_supplement_1.pdf]

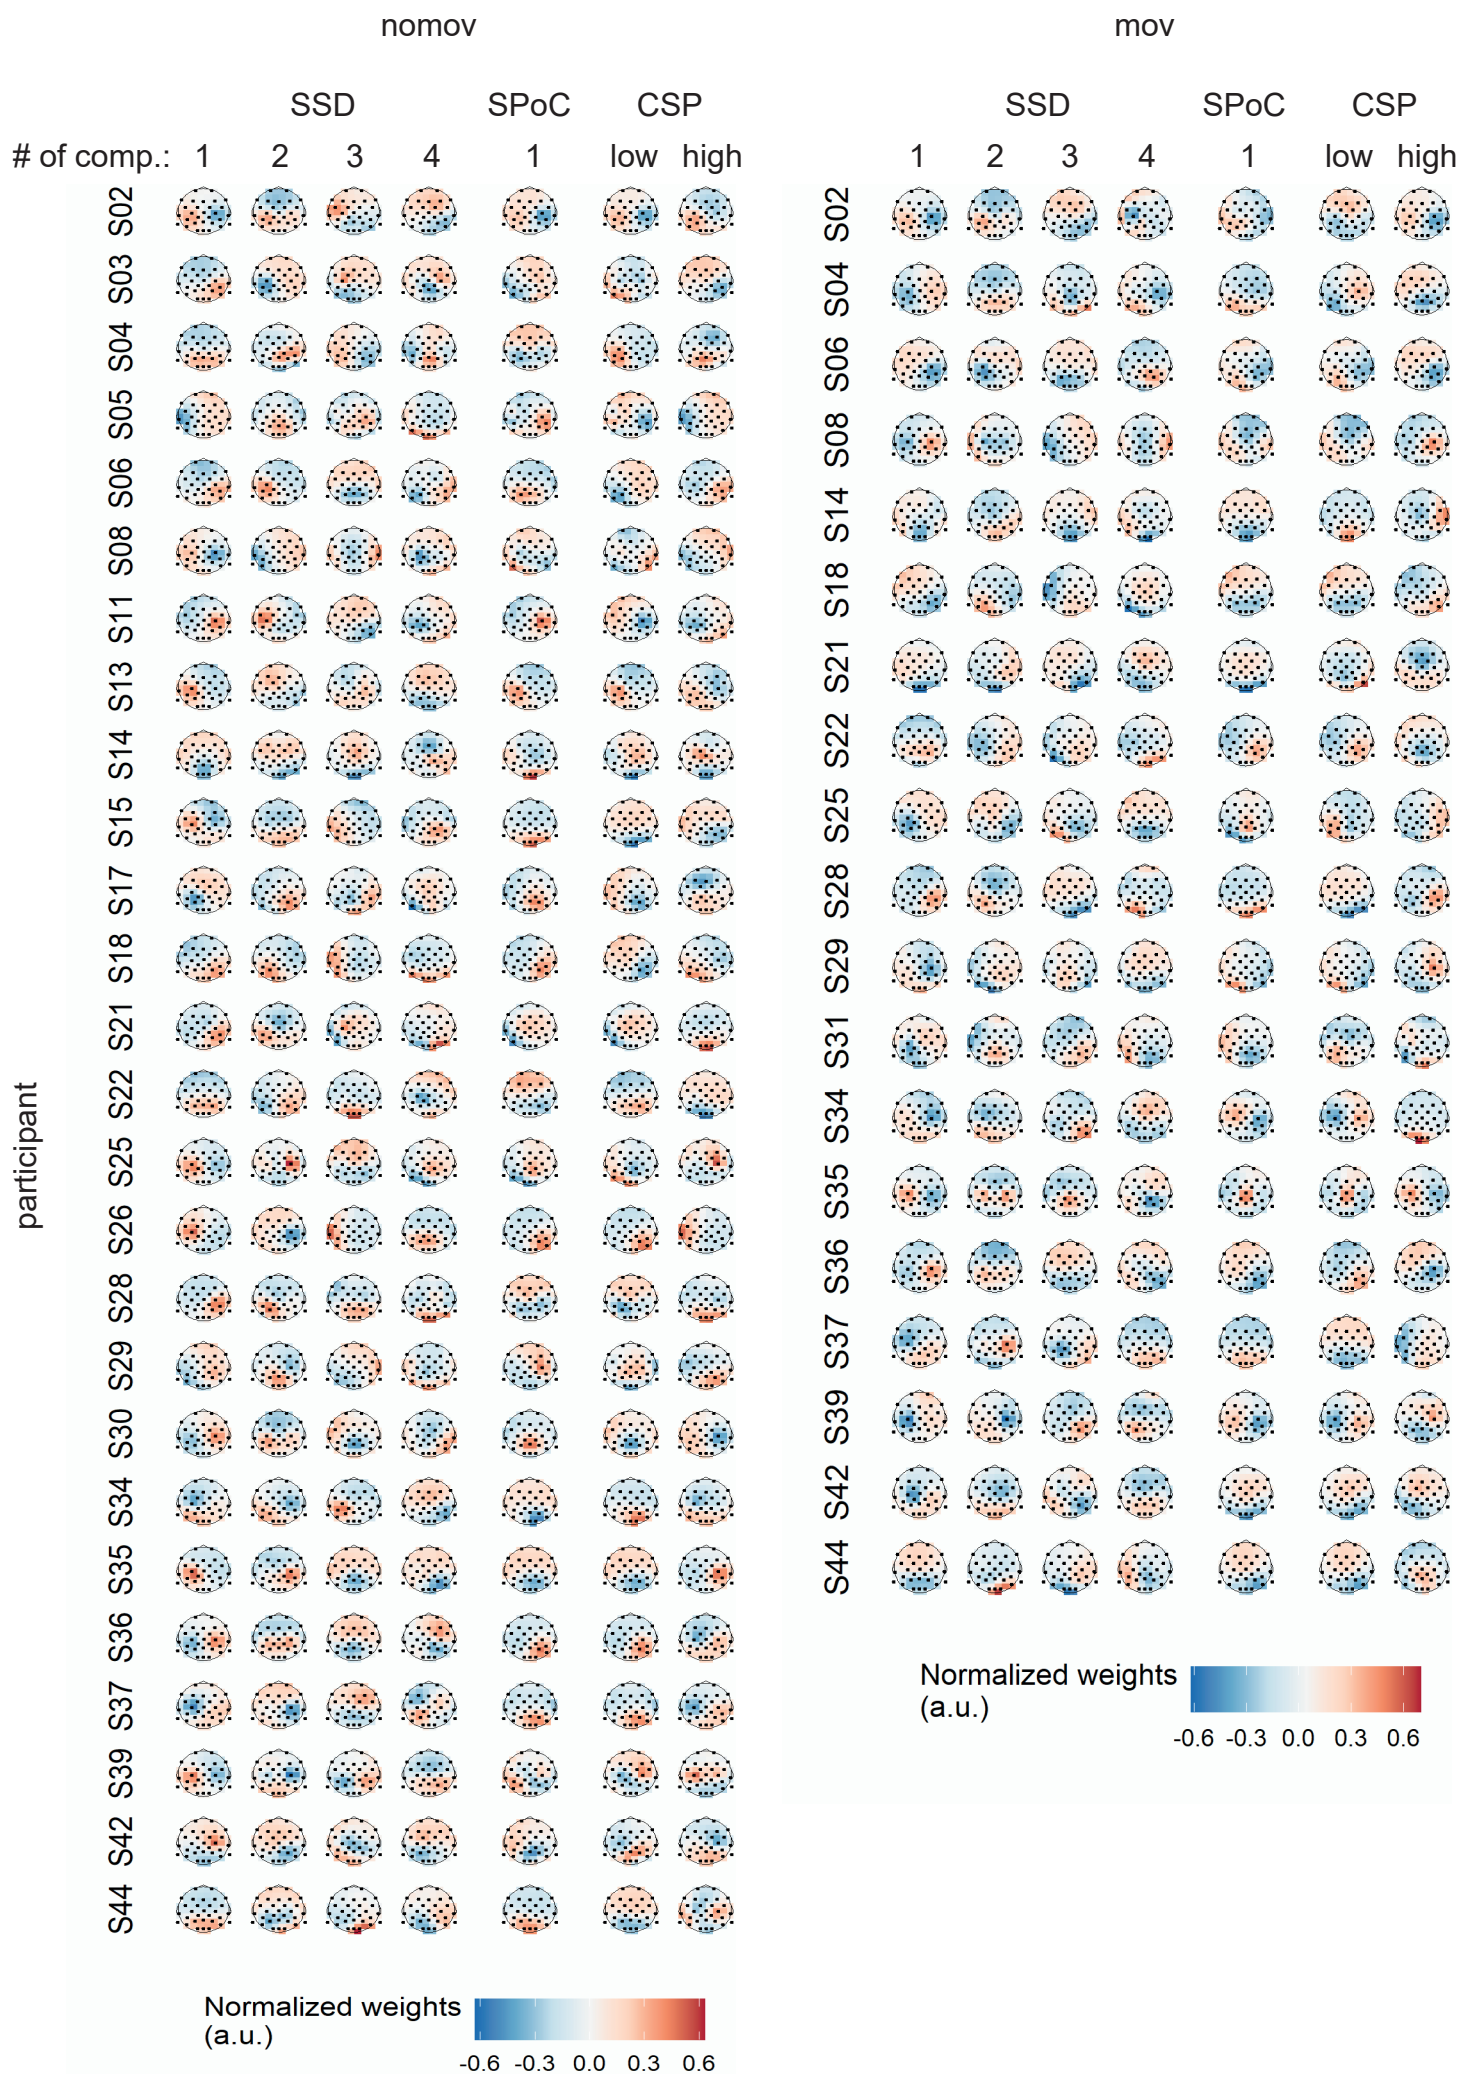

Supplement: supp [file elife-64812-supp-v1.zip › elife_poa_e64812_Figure_6_figure_supplement_1.pdf]
